# Supplementary material for: Suppression of AMPK/aak-2 by NRF2/SKN-1 down-regulates autophagy during prolonged oxidative stress
Source: PubMed Central journal article supplement (PMC6338645; doi:10.1096/fj.201800565rr), 2018-10-02
Supplement: fj.201800565RR.sf1.pdf [file fj.201800565RR.sf1.pdf]

## Suppl. Figure 1

A

| Sample                  | % of cells in DCF+ |
|-------------------------|--------------------|
| Control                 | 5.1                |
| Control +siRNA          | 0.87               |
| 100 $\mu$ M TBHP        | 5.8                |
| 100 $\mu$ M TBHP +siRNA | 5.0                |
| 300 $\mu$ M TBHP        | 19                 |
| 300 $\mu$ M TBHP +siRNA | 1.5                |

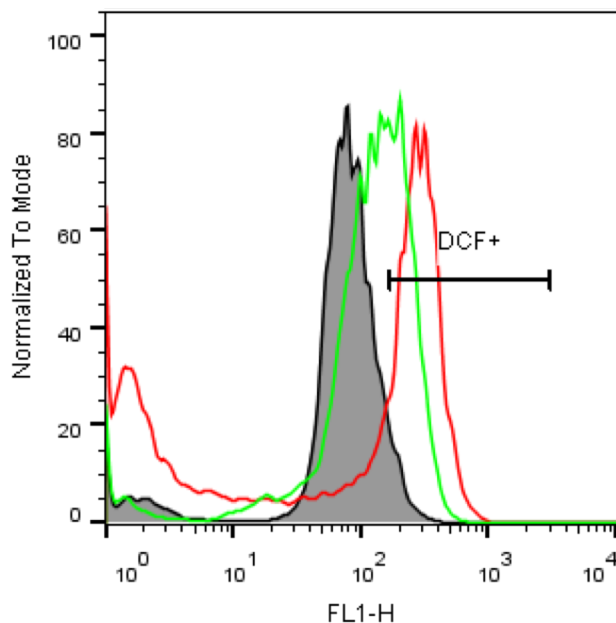

B

| Sample                  | % of cells in BOD+ |
|-------------------------|--------------------|
| Control                 | 6.3                |
| Control +siRNA          | 6.2                |
| 100 $\mu$ M TBHP        | 25.0               |
| 100 $\mu$ M TBHP +siRNA | 17.6               |
| 300 $\mu$ M TBHP        | 19.9               |
| 300 $\mu$ M TBHP +siRNA | 17.4               |

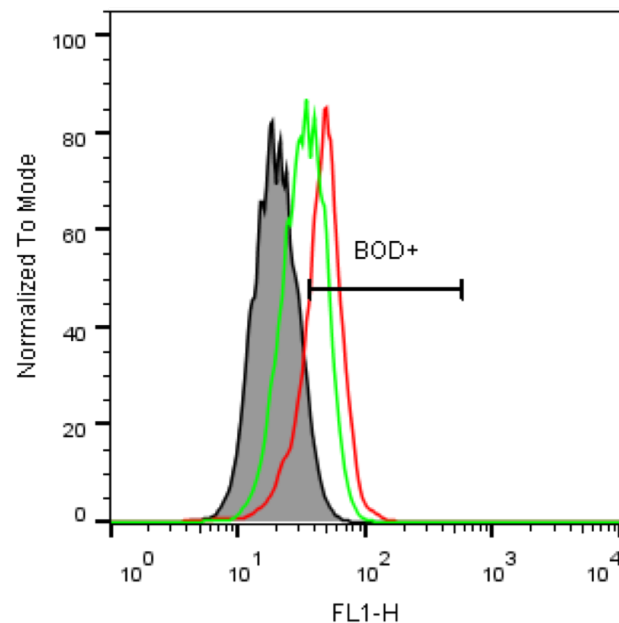

**Suppl. Figure 1. Oxidative stress induced by TBHP and the effect of NRF2 siRNA silencing.** HEK cells were seeded on 6 well plates and left untreated (Control) or treated as indicated with TBHP (100 or 300  $\mu$ M) for 2 hours. *NRF2* gene expression was depleted by *NRF2* siRNA. 24 hours before treatment as indicated. After treatment cells were labelled with (a.) 10  $\mu$ M dichlorofluorescein-diacetate (DCF) or (b.) 2  $\mu$ M Bodipy-C11 (BOD) and analyzed by flow cytometry. One representative experiment is shown. Black line: untreated cell; red line: 300  $\mu$ M TBHP; green line: 300  $\mu$ M combined with NRF2 silencing.

## Suppl. Figure 2

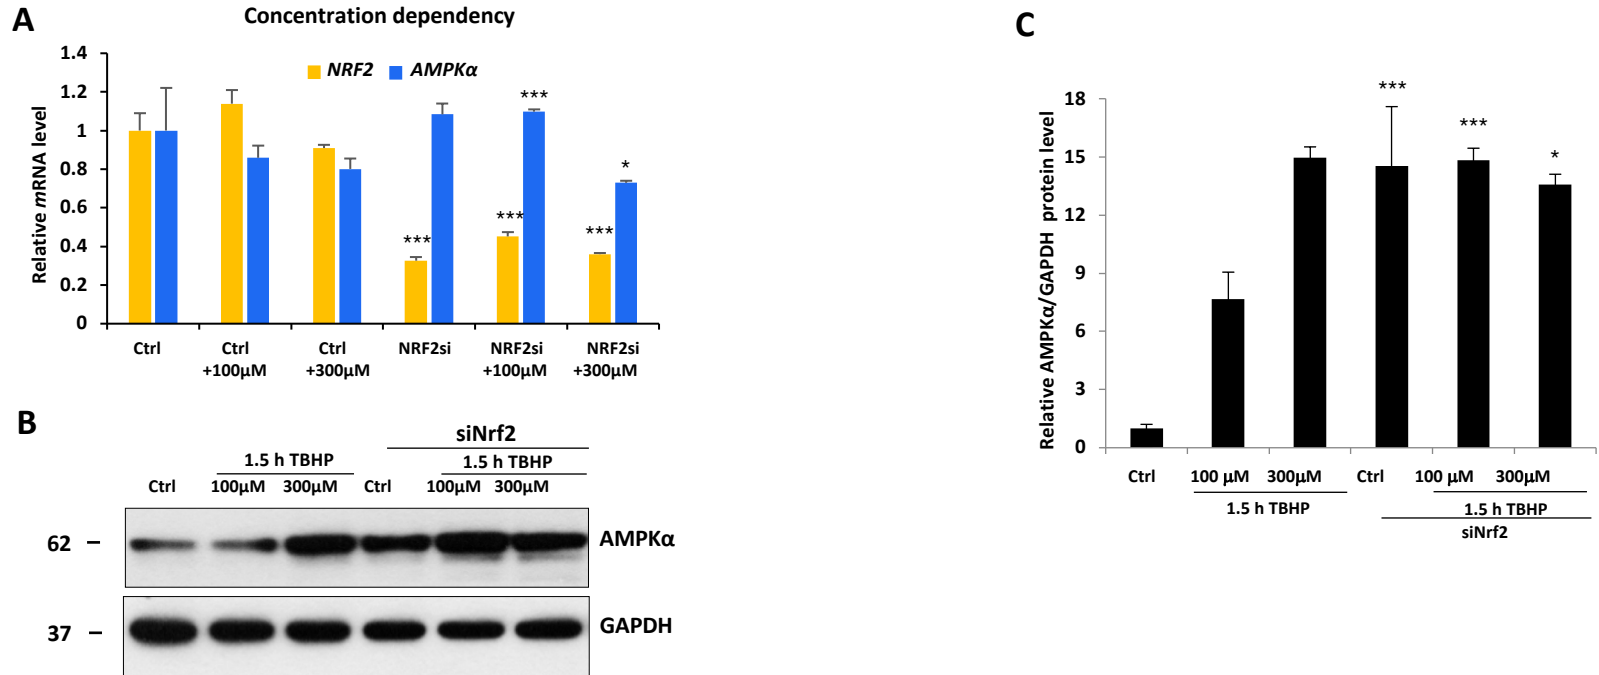

**Suppl. Figure 2. NRF2 down-regulates the mRNA and protein level of AMPK in HEK293T cell line.** (A) Concentration dependency of both *NRF2* and *AMPK $\alpha$*  mRNA levels in oxidative stress. HEK293T cells treated with 100 or 300  $\mu$ M TBHP for 1.5 hours. *NRF2* gene expression was depleted by *NRF2* siRNA. Relative level of mRNA was measured by real-time PCR. Samples were compared to their partner with siNRF2 background. (B) Concentration dependency of total AMPK $\alpha$  protein level during oxidative stress. Cells were treated with 100 or 300  $\mu$ M TBHP and AMPK $\alpha$  level was detected by immunoblotting. *Nrf2* gene expression was depleted by *Nrf2* siRNA. GAPDH was used as a loading control. (C) Quantification and statistical analysis of the Western blot assays. Samples were compared to their partner with siNRF2 background. In panels A and C, \*\*\*:  $p < 0.005$ , \*\*:  $p < 0.01$ , \*:  $p < 0.05$  (Independent two-sample t-tests). Error bars represent  $\pm$ SEM.

## Suppl. Figure 3

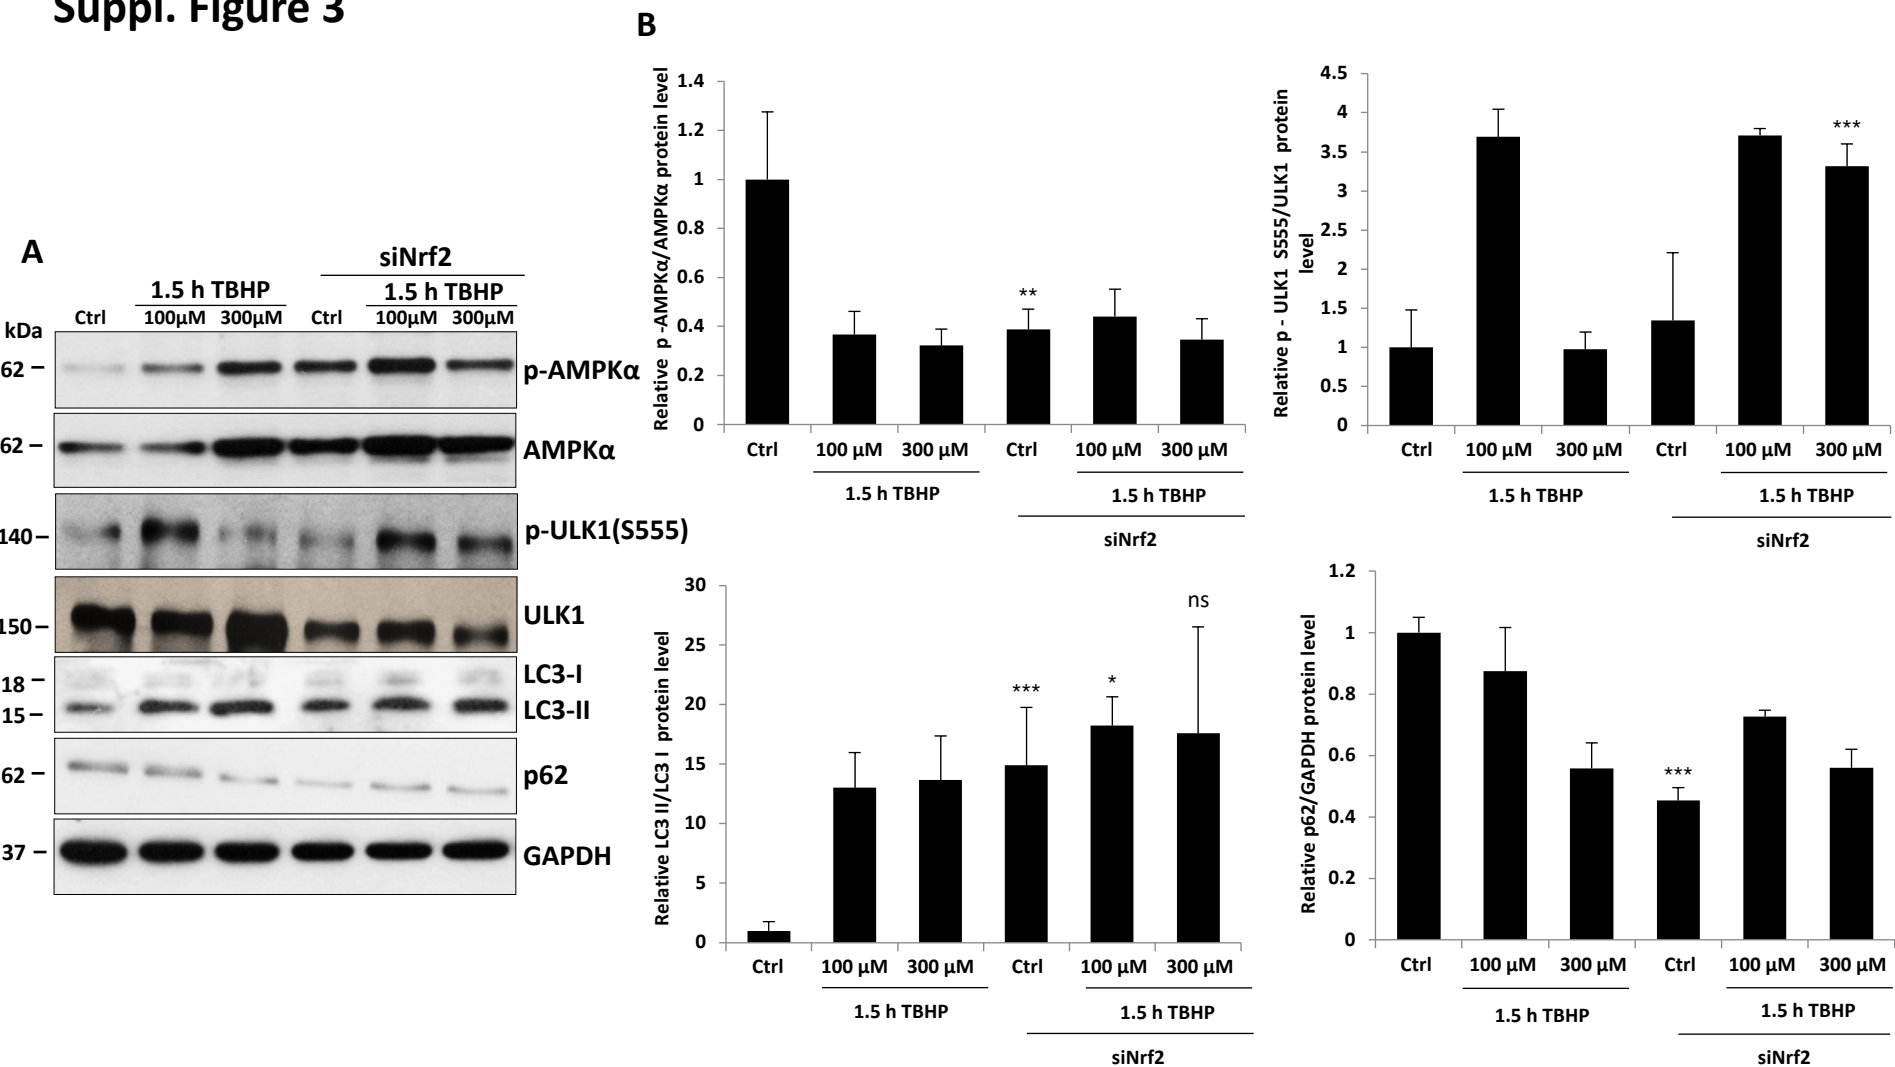

**Suppl. Figure 3. Western blot analysis for AMPKα, ULK1, LC3, and other autophagy-related proteins in HEK 293T cell line. (A)** Dose-dependency of autophagy down-regulation by NRF2. Western blot results of cells treated with 100 or 300 μM TBHP for 1.5 hours. In half of the samples *NRF2* gene expression was depleted by *NRF2* siRNA. The blots were re-probed/normalized using GAPDH as a loading control. The AMPKα and GAPDH blots are the same as those appearing in Suppl. Fig. 2B. **(B)** Quantification and statistical analysis of the Western blot assays. Samples were compared to their partner with siNRF2 background. \*\*\*:  $p < 0.005$ , \*\*:  $p < 0.01$ , \*:  $p < 0.05$  (Independent two-sample t-tests). Error bars represent  $\pm$ SEM

## Suppl. Figure 4

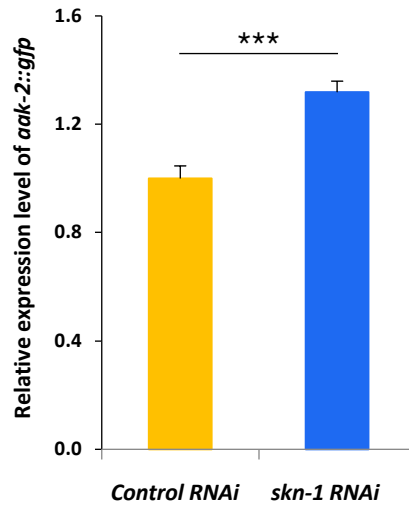

**Suppl. Figure 4. SKN-1/NRF2 downregulates *aak-2*/AMPK expression upon oxidative stress in *C. elegans*.** Expression of *aak-2::gfp* transgene was increased when *skn-1* gene expression was silenced by *skn-1* RNAi. \*\*\*:  $p < 0.005$ , (Independent two-sample t-tests). Error bars represent  $\pm$ SEM.

## Suppl. Figure 5

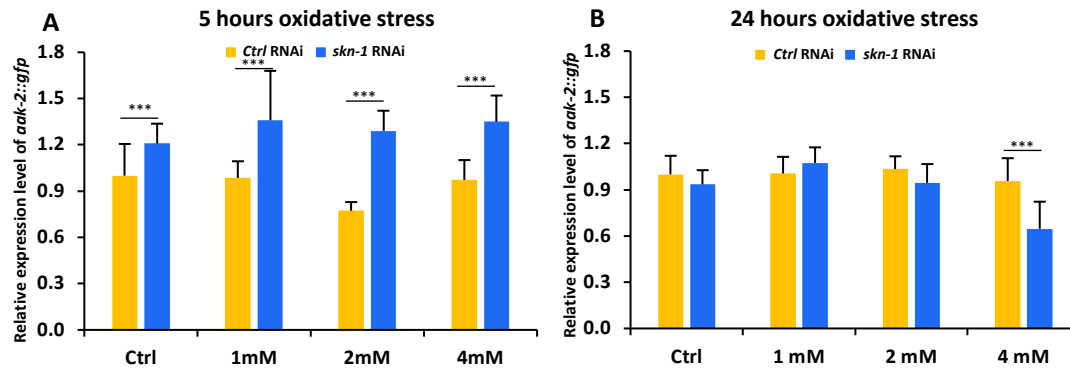

**Suppl. Figure 5. Dose dependence of the SKN-1/NRF2 downregulation on *aak-2*/AMPK expression upon oxidative stress in *C. elegans*.** Expression of *aak-2::gfp* transgene was increased when *skn-1* gene expression was silenced by *skn-1* RNAi. \*\*\*:  $p < 0.005$ , (Independent two-sample t-tests). Error bars represent  $\pm$ SEM.
